# Supplementary material for: Quantitative and Functional Assessment of the Influence of Routinely Used Cryopreservation Media on Mononuclear Leukocytes for Medical Research
Source: MDPI journal article supplement (doi:10.3390/ijms23031881), 2022-02-07
Supplement: s1 [file s1]

## **Supplementary Material**

**for**

### **Quantitative and Functional Assessment of the Influence of Routinely Used Cryopreservation Media on Mononuclear Leukocytes for Medical Research**

Patrick Haider<sup>1,2</sup>, Timothy Hoberstorfer<sup>1</sup>, Manuel Salzmann<sup>1</sup>, Michael B. Fischer<sup>3</sup>, Walter S.  
Speidl<sup>1,2</sup>, Johann Wojta<sup>1,2,4</sup>, Philipp J. Hohensinner<sup>2,5</sup>

<sup>1</sup>Department of Internal Medicine II/Division of Cardiology; Medical University of Vienna;  
Vienna; Austria

<sup>2</sup>Ludwig Boltzmann Institute for Cardiovascular Research; Medical University of Vienna;  
Vienna; Austria

<sup>3</sup>Department of Blood Group Serology and Transfusion Medicine; Medical University of Vienna;  
Vienna; Austria

<sup>4</sup>Core Facilities; Medical University of Vienna; Vienna; Austria

<sup>5</sup>Center for Biomedical Research; Medical University of Vienna; Vienna; Austria

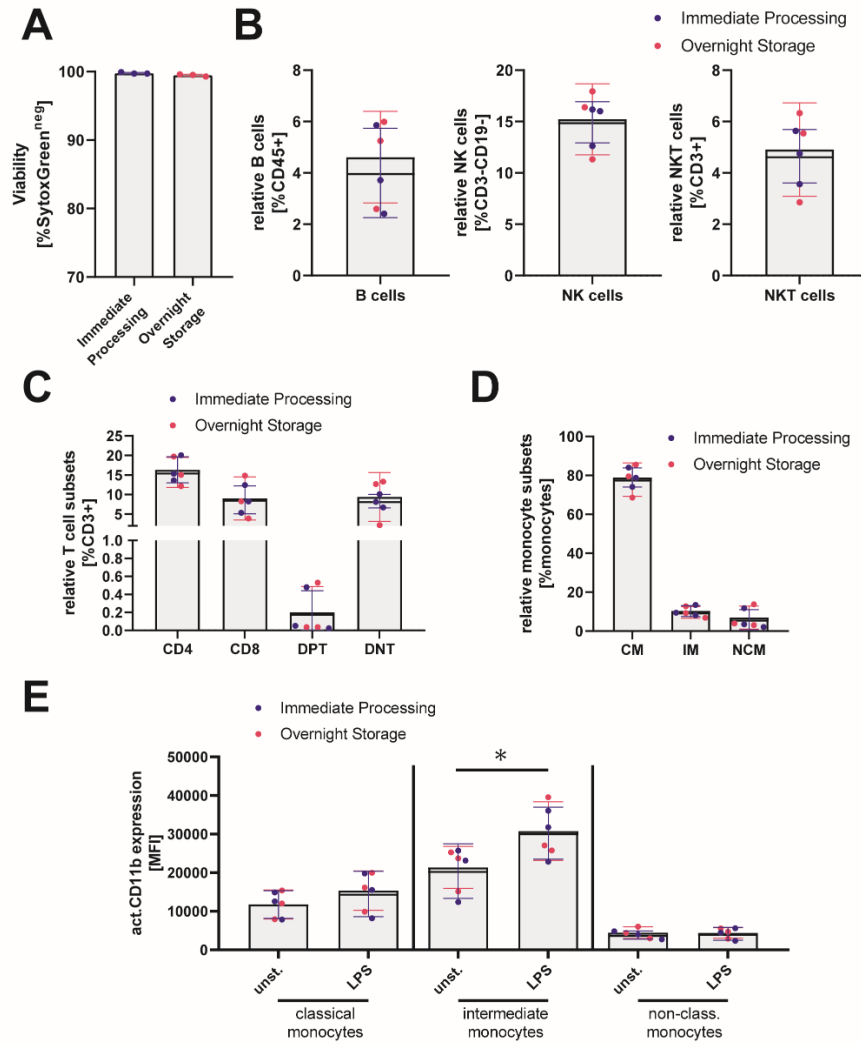

**Figure S1: Comparison of immediately processed vs. overnight stored LRSCs.** The influence of overnight storage of LRSC at 4°C was assessed in a validation cohort to assess if storage induces a bias compared to immediate processing after leukapheresis. **(A)** Viability assessment by SytoxGreen nuclear staining. **(B)** Relative amounts of B cells, NK cells and NKT cells. **(C)** Relative amounts of T cell subpopulations (CD4, CD8, DPT, DNT). **(D)** Relative distribution of monocyte subsets (CM, IM, NCM). **(E)** MFI of activated CD11b expression on different monocyte subsets which were left unstimulated or were stimulated with 100 ng/ml LPS. \* indicates  $p < 0.05$  between unstimulated and LPS stimulated intermediate monocytes. \*  $p < 0.05$  ( $n = 3$  individual human donors).

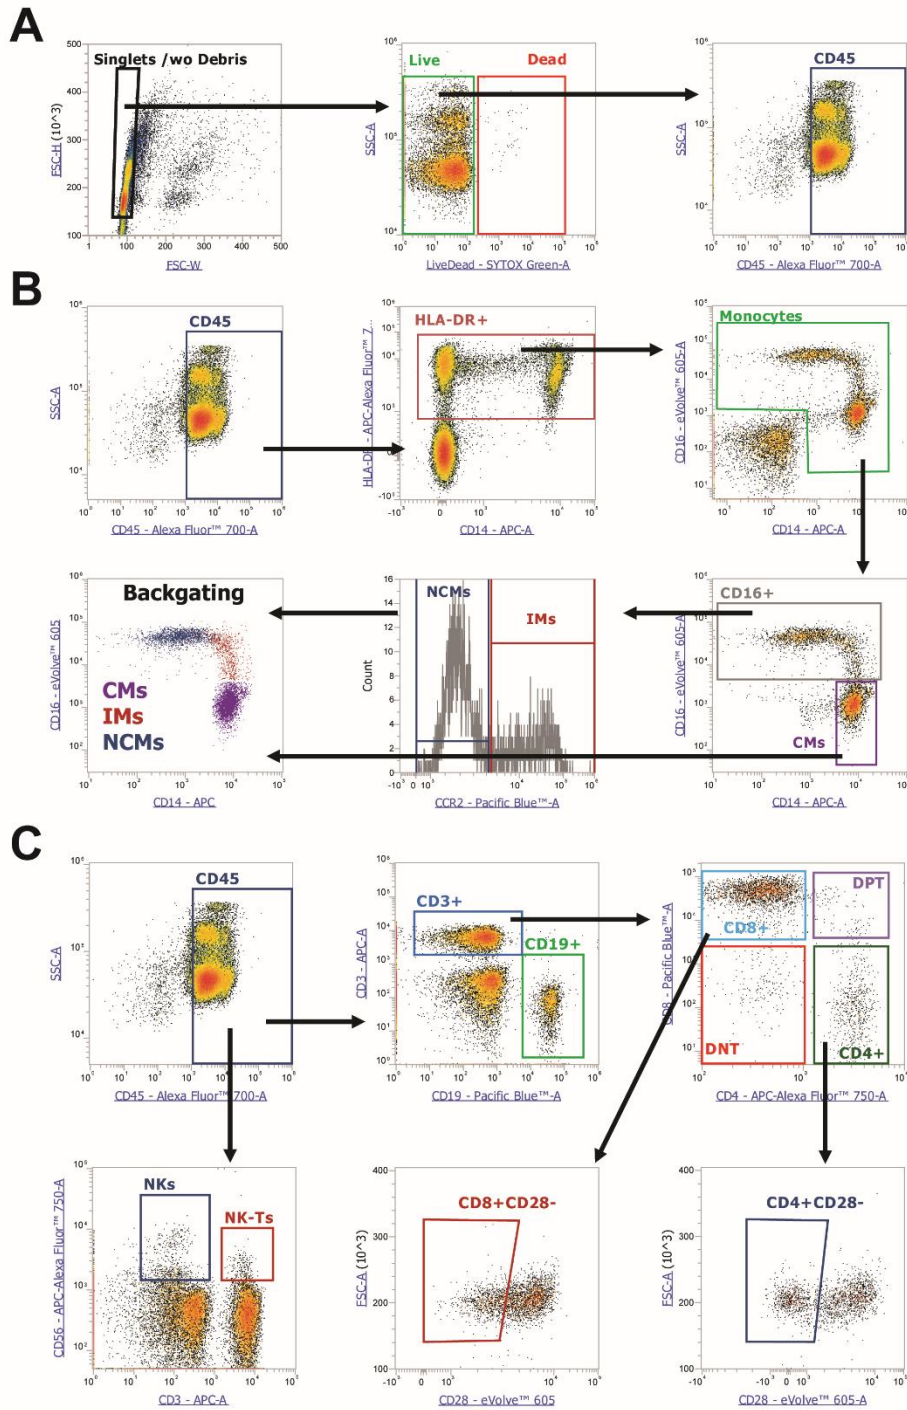

**Figure S2. Flow cytometric gating scheme.** (A) Gating strategy for singlets, live/dead cells and CD45+ leukocytes. (B) Gating strategy for monocytes and their subsets. The cells were pre-gated according to Panel A. (C) Gating strategy for lymphocyte subsets. The cells were pre-gated according to Panel A.

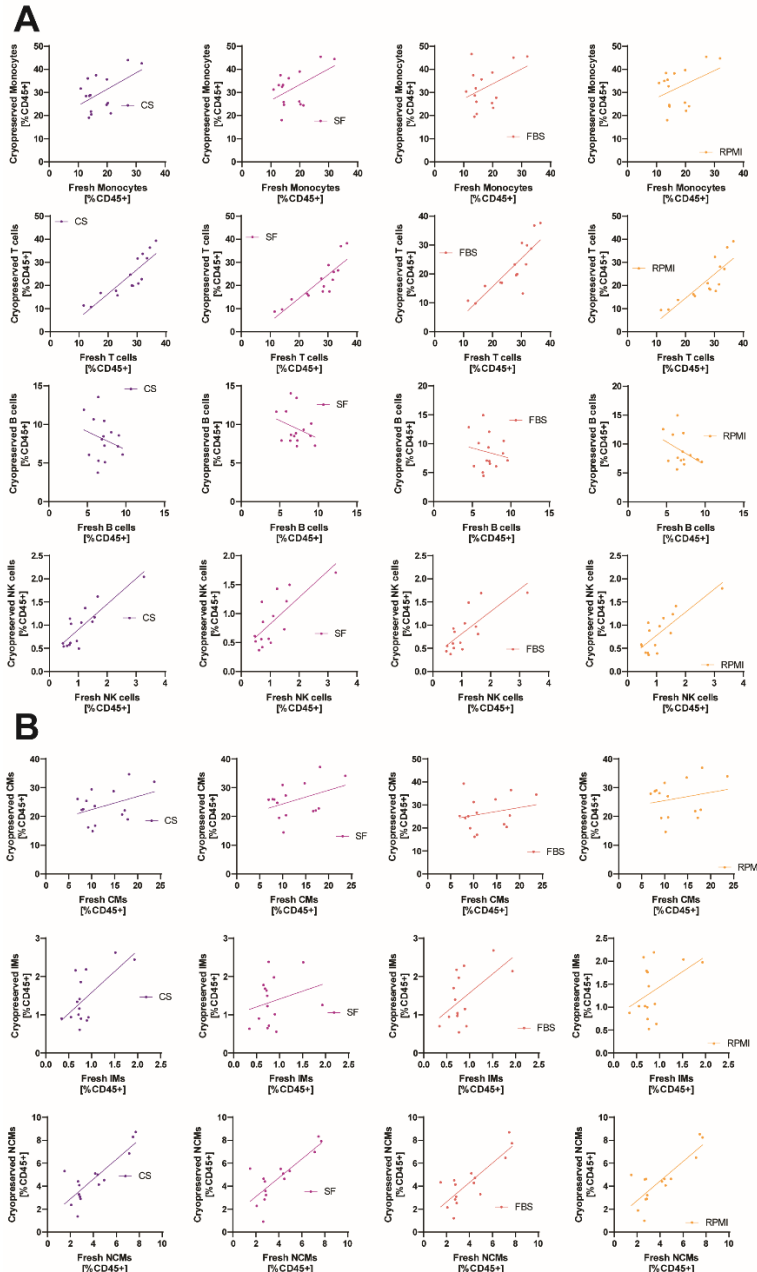

**Figure S3. : Individual correlation plots between fresh and cryopreserved samples for all MNC subpopulations. (A)** Correlation plots of relative cell amounts of monocytes, T cells, B cells and NK cells before and after cryopreservation for each individual cryopreservation medium and cell population. Correlation was analyzed by linear regression. **(B)** Correlation plots of relative monocyte subset distribution before and after cryopreservation for each individual cryopreservation medium and cell population. Correlation was analyzed by linear regression.

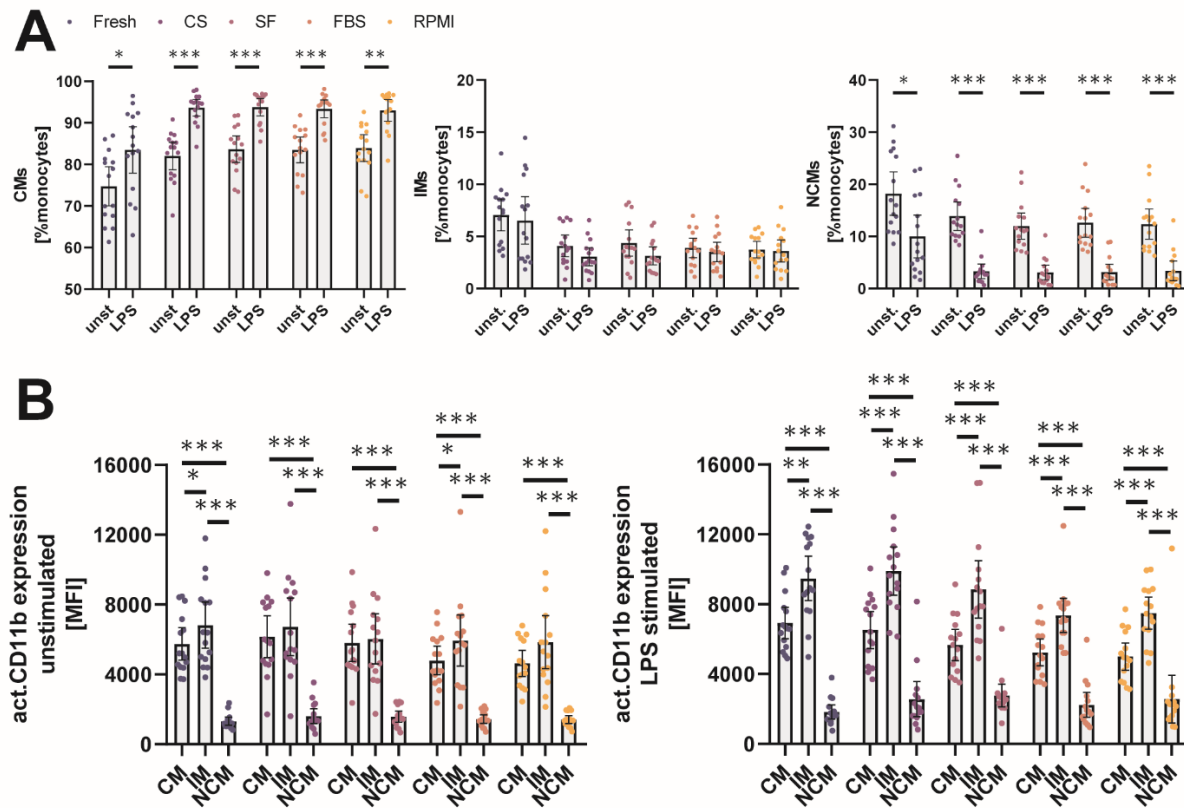

**Figure S4. Cryopreservation affects the activatability of the CD11b surface integrin. (A)**

Relative distribution of the different monocyte subsets measured by flow cytometry for

unstimulated (left respective bar) and LPS stimulated (right respective bar) cells. **(B)** Median

fluorescence intensity (MFI) of activated CD11b expression of the different monocyte subsets

measured by flow cytometry for unstimulated (left panel) and LPS stimulated (right panel) cells.

CM = classical monocytes, IM = intermediate monocytes, NCM = non-classical monocytes. \*  $p < 0.05$ ; \*\*  $p < 0.01$ ; \*\*\*  $p < 0.001$ . (n = 15 individual human donors).
